# Supplementary material for: Rhodamine derived colorimetric and fluorescence mercury(ii) chemodosimeter for human breast cancer cell (MCF7) imaging
Source: Royal Society of Chemistry journal article supplement (doi:10.1039/c4ra14624g), 2015-01-01
Supplement: c4ra14624g1.pdf [file c4ra14624g1.pdf]

## Electronic Supplementary Information (ESI)

### Rhodamine derived colorimetric and fluorescence mercury(II) sensor for human breast cancer cell (MCF7) imaging

Babli Kumari<sup>a</sup>, Sisir Lohar<sup>a</sup>, Sangita Adhikari<sup>a</sup>, Archya Sengupta<sup>b</sup>, Ansuman Chattopadhyay<sup>b</sup>, Paula Brandao<sup>c</sup>, Vitor Felix<sup>\*d</sup> and Debasis Das<sup>a\*</sup>

#### UV-Vis and fluorescence titration

The path length of cells used for absorption and emission studies is 1 cm. For UV-Vis and fluorescence titrations, stock solution of **RDHDNAP** (20  $\mu\text{M}$ ) has been prepared in HEPES buffered (0.1 M) solution (ethanol/water = 3/7, v/v, pH 7.4). Working solutions of **RDHDNAP** and  $\text{Hg}(\text{NO}_3)_2 \cdot \text{H}_2\text{O}$  are prepared from their respective stock solutions. Fluorescence measurements are performed using 5 nm  $\times$  5 nm slit width.

#### Quantum yield measurements

The fluorescence quantum yield has been determined using Rhodamine B as a reference with a known  $\phi_{\text{ref}}$  value of 0.65 in basic  $\text{CH}_3\text{OH}$ . The area of the emission spectrum is integrated using the software available in the instrument and the quantum yield is calculated according to the following equation:

$$\phi_{\text{sample}} = \phi_{\text{ref}} \times [A_{\text{sample}}/A_{\text{ref}}] \times [OD_{\text{ref}}/OD_{\text{sample}}]$$

Where  $\phi_{\text{sample}}$  and  $\phi_{\text{ref}}$  are the fluorescence quantum yield of the sample and reference, respectively;  $A_{\text{sample}}$  and  $A_{\text{ref}}$  are the area under the fluorescence spectra of the sample and the reference, respectively;  $OD_{\text{sample}}$  and  $OD_{\text{ref}}$  are the corresponding optical densities of the sample and the reference solution at the wavelength of excitation.

#### Job's plot from fluorescence measurements

A series of solutions containing **RDHDNAP** and  $\text{Hg}(\text{NO}_3)_2 \cdot \text{H}_2\text{O}$  are prepared such that the total concentration of  $\text{Hg}^{2+}$  and **RDHDNAP** remain constant (20  $\mu\text{M}$ ) in all the sets. The mole fraction (X) of **RDHDNAP** is varied from 0.1 to 0.8. The emission intensity at 591 nm is plotted against the mole fraction of **RDHDNAP**.

## Determination of detection limit

To determine the detection limit, fluorescence titration of RDHDNAP with  $\text{Hg}^{2+}$  is carried out by adding aliquots of micro-molar concentration of  $\text{Hg}^{2+}$ . From the concentration at which there is a sharp change in the fluorescence intensity multiplied with the concentration of RDHDNAP gives the detection limit.<sup>3</sup> Equations used for the calculation of detection limit (DL):  $\text{DL} = \text{CL} \times \text{CT}$ , Where CL is the concentration of ligand, CT is the concentration of  $\text{Hg}^{2+}$  at which fluorescence enhanced. Thus:  $\text{DL for RDHDNAP} = 10^{-6}\text{M} \times (3 \times 10^{-7})\text{M} = 3 \times 10^{-7}\text{M}$

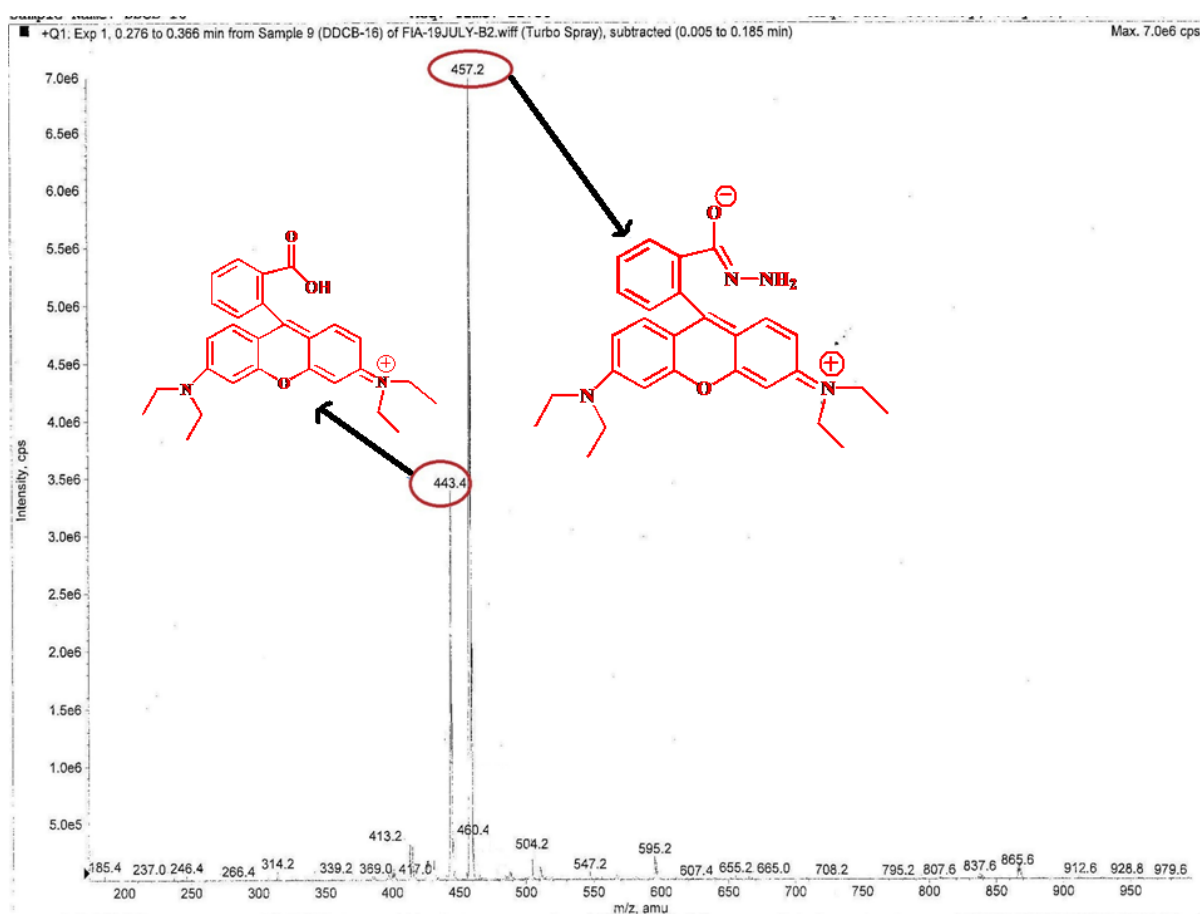

Fig.S1 QTOF MS spectrum of the [RDHDNAP-Hg<sup>2+</sup>] system.

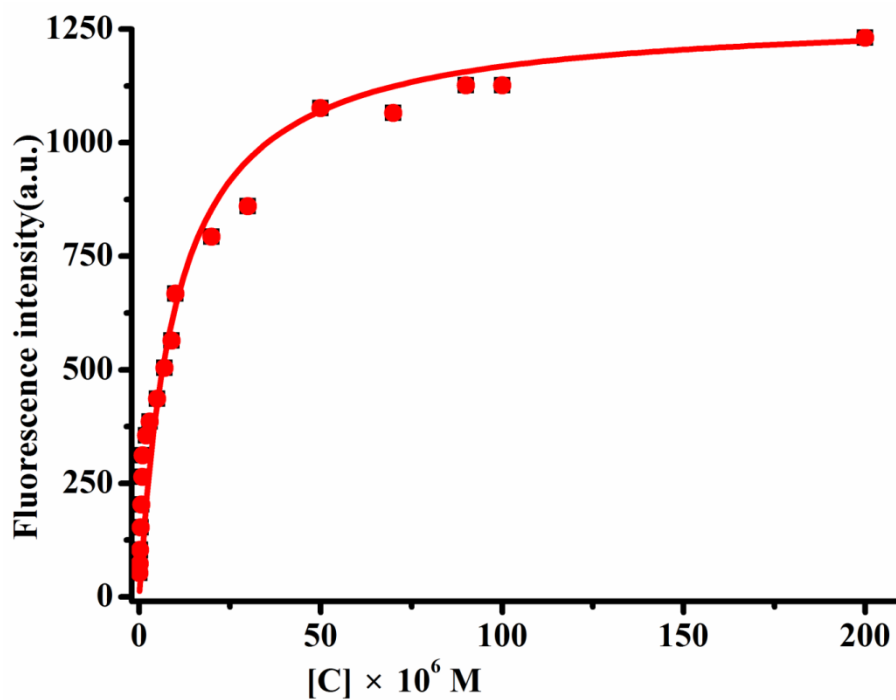

**Fig.S2** Emission intensity of **RDHDNAP** vs. externally added  $\text{Hg}^{2+}$  (0.01–800.0  $\mu\text{M}$ ,  $\lambda_{\text{ex}}$ , 550 nm;  $\lambda_{\text{em}}$ , 591 nm).

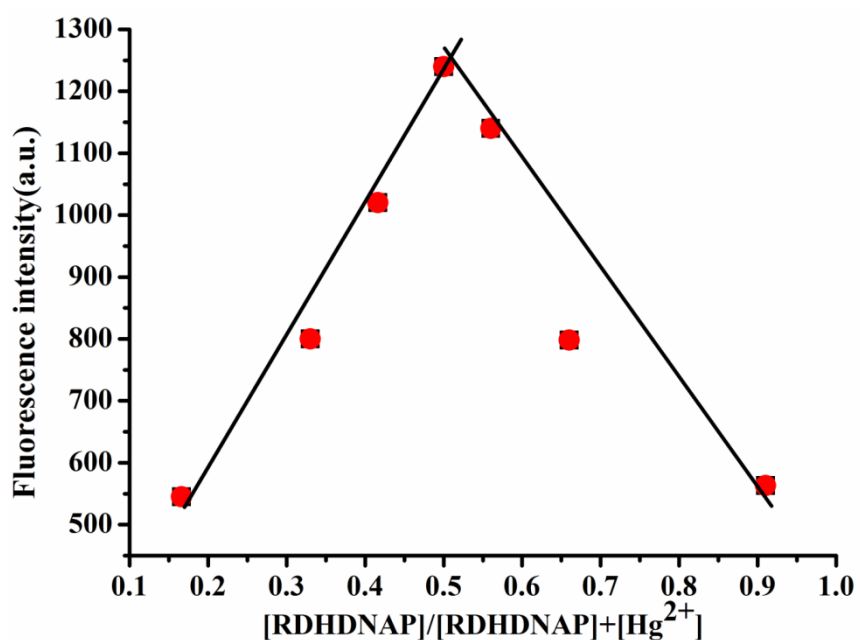

**Fig.S3** Job's plot for stoichiometry determination between **RDHDNAP** and  $\text{Hg}^{2+}$  in HEPES buffered (0.1 M) solution (ethanol/water = 3/7, v/v, pH 7.4)

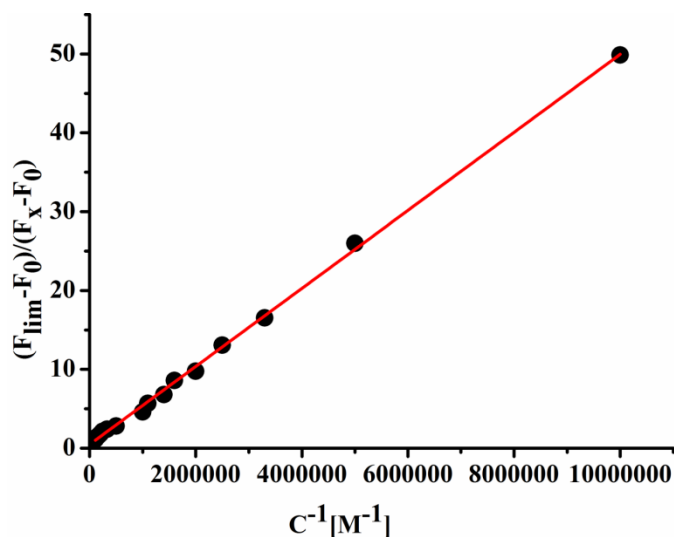

**Fig.S4** Determination of the association constant of **RDHDNAP** for  $\text{Hg}^{2+}$  using  $(F_{\text{lim}} - F_0)/(F_x - F_0) = 1 + (1/K) \times (1/[M]^n)$ , where  $F_0$ ,  $F_x$ , and  $F_{\text{lim}}$  are the emission intensities of **RDHDNAP** in absence of  $\text{Hg}^{2+}$ , at an intermediate  $\text{Hg}^{2+}$  concentration, and at a concentration of complete interaction with  $\text{Hg}^{2+}$  ( $\lambda_{\text{ex}}$ , 550 nm;  $\lambda_{\text{em}}$ , 591 nm).

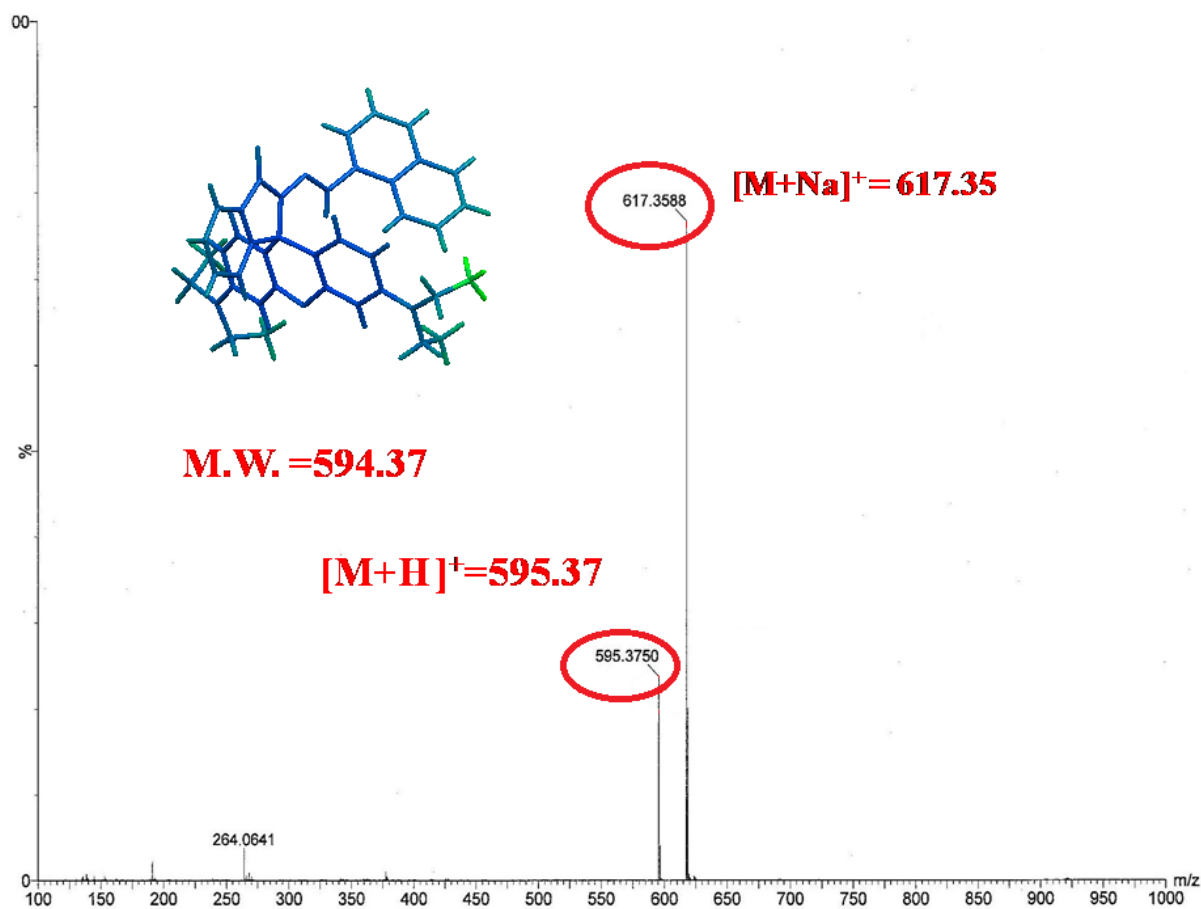

**Fig.S5** QTOF MS spectrum of **RDHDNAP**

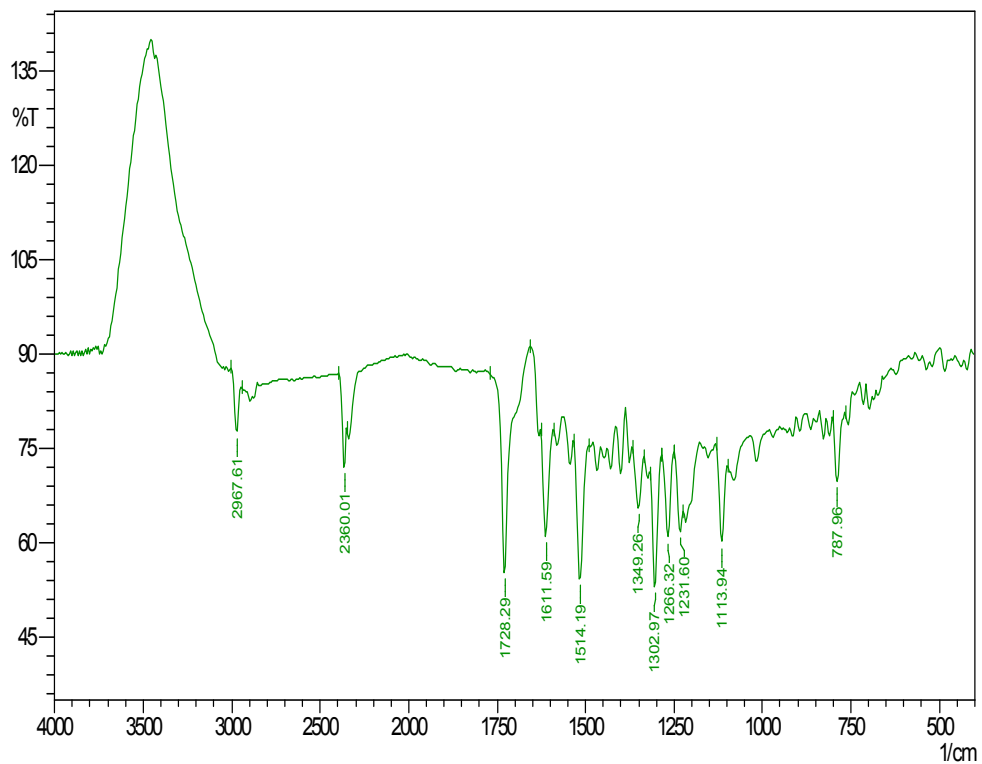

Fig. S6 FTIR spectrum of **RDHDNAP**

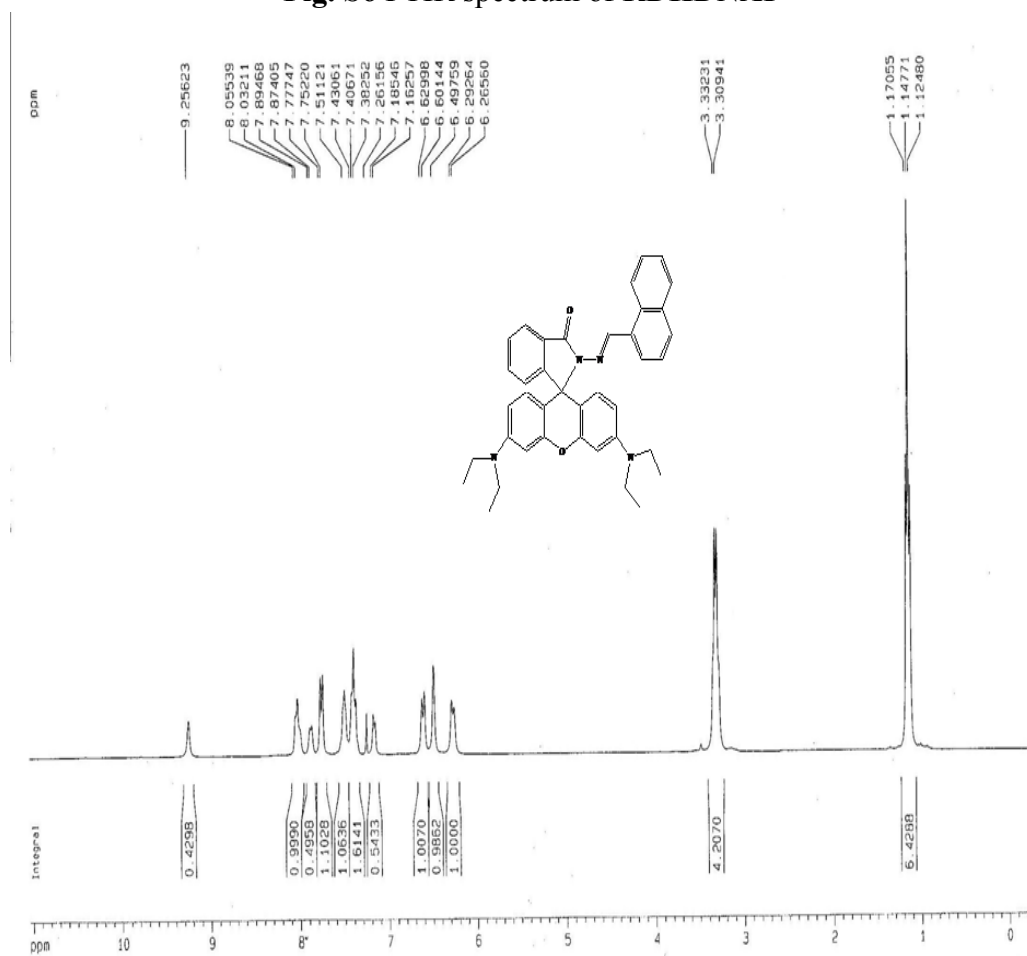

Fig S7 <sup>1</sup>H NMR spectrum of **RDHDNAP** in CDCl<sub>3</sub>

300 MHz NMR Machine; Department of Chemistry; University of Calcutta; SAP-CAS Program  
Sample:RdNP;13C;CDCL3;Supervisor:Dr.S.S.Adhikari;Dt:30/12/14 Operator S.Chatterjee

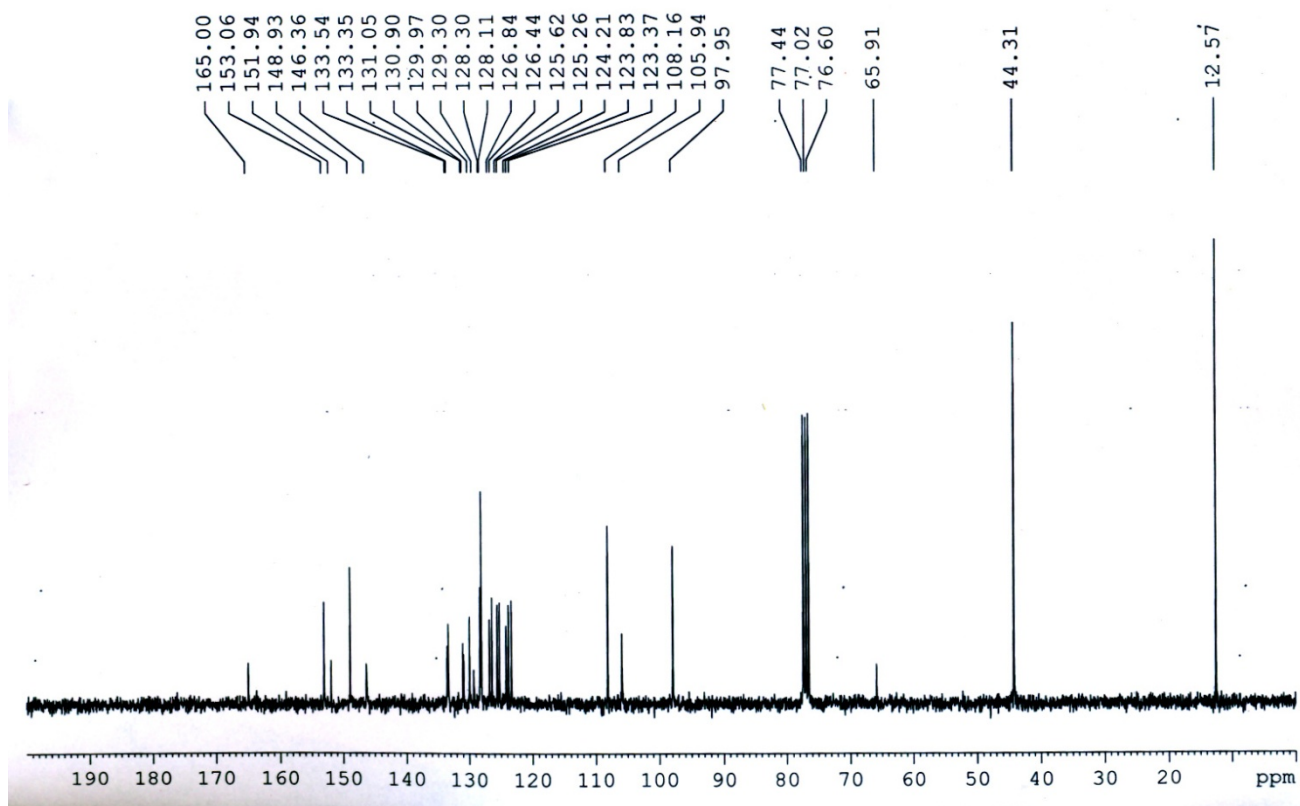

Fig S8  $^{13}\text{C}$  NMR spectrum of **RDHDNAP** in  $\text{CDCl}_3$

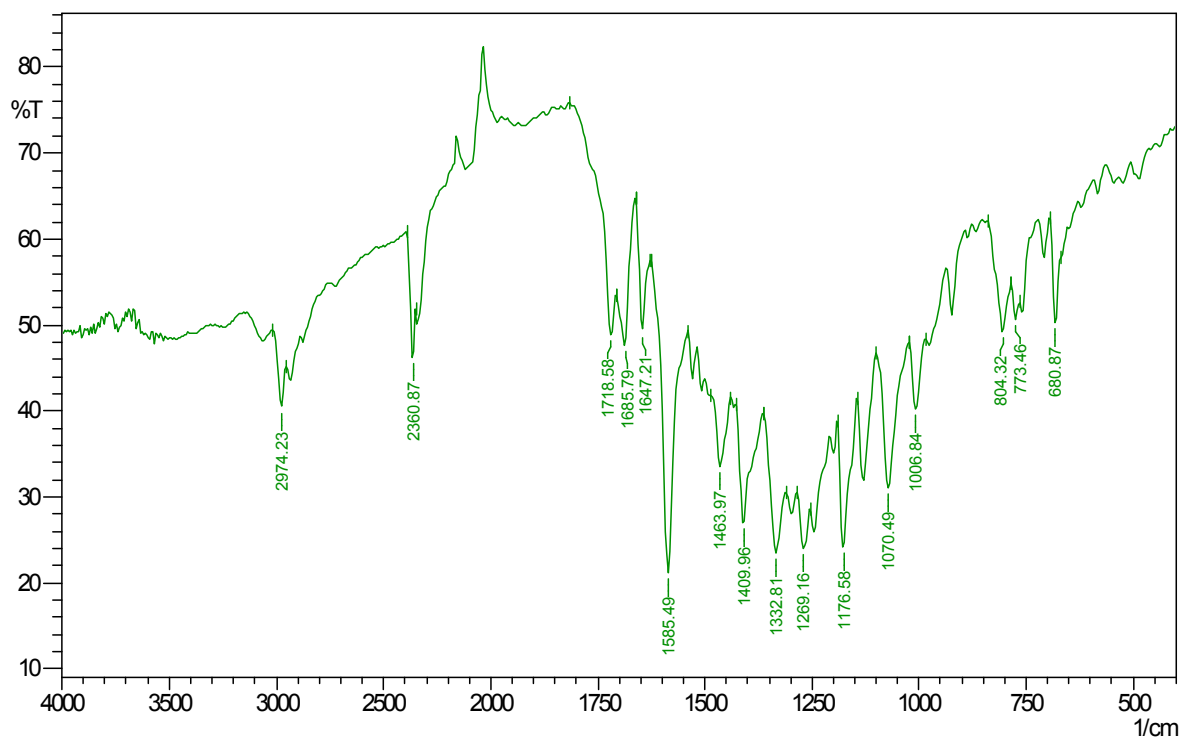

**Fig.S9** FTIR spectrum of [RDHDNAP–Hg<sup>2+</sup>] adduct

Table S1 Selected cell parameters of **RDHDNAP** and **RDHDPY**

|                                 |                                                               |                                                               |
|---------------------------------|---------------------------------------------------------------|---------------------------------------------------------------|
| Empirical formula               | C <sub>45</sub> H <sub>40</sub> N <sub>4</sub> O <sub>2</sub> | C <sub>39</sub> H <sub>38</sub> N <sub>4</sub> O <sub>2</sub> |
| Formula weight                  | 668.81                                                        | 594.73                                                        |
| Temperature                     | 296(2)                                                        | 150(2)                                                        |
| Wavelength                      | 0.71073                                                       | 0.71073                                                       |
| Unit cell dimensions            | 9.273(4)                                                      | 11.5411(14)                                                   |
|                                 | 16.808(7)                                                     | 11.5412(10)                                                   |
|                                 | 23.315(9)                                                     | 23.608(2)                                                     |
|                                 | 90.00                                                         | 90.00                                                         |
|                                 | 100.688(15)                                                   | 92.592(4)                                                     |
|                                 | 90.00                                                         | 90.00                                                         |
| Volume                          | 3571(2)                                                       | 3141.4(6)                                                     |
| Z                               | 4                                                             | 4                                                             |
| Density (calculated)            | 1.244                                                         | 1.258                                                         |
| Absorption coefficient          | 0.077                                                         | 0.078                                                         |
| F(000)                          | 1416                                                          | 1264                                                          |
| Crystal size                    |                                                               |                                                               |
| Theta range for data collection | 1.50, 26.37                                                   | 1.93, 26.42                                                   |
| Index ranges                    | -11,h 9-20, k 20-28,l 29                                      |                                                               |
| Reflections collected           | 3738                                                          | 4434                                                          |

Table S2 Selected bond lengths [ $\text{\AA}$ ] for **RDHDNAP**

|         |          |         |          |
|---------|----------|---------|----------|
| O1 C2   | 1.386(3) | C25 C30 | 1.382(3) |
| O1 C14  | 1.386(3) | C26 C27 | 1.396(4) |
| C2 C7   | 1.377(3) | C27 C28 | 1.385(4) |
| C2 C3   | 1.390(3) | C28 C29 | 1.372(4) |
| C3 C4   | 1.403(3) | C29 C30 | 1.400(4) |
| C4 N15  | 1.374(3) | C30 C31 | 1.469(4) |
| C4 C5   | 1.400(4) | C31 O33 | 1.214(3) |
| C5 C6   | 1.370(4) | C31 N32 | 1.391(3) |
| C6 C7   | 1.398(3) | N32 N34 | 1.389(3) |
| C7 C8   | 1.509(3) | N34 C35 | 1.272(4) |
| C8 N32  | 1.506(3) | C35 C36 | 1.499(4) |
| C8 C25  | 1.522(4) | C36 C37 | 1.385(4) |
| C8 C9   | 1.524(3) | C36 C51 | 1.409(4) |
| C9 C14  | 1.383(3) | C37 C38 | 1.379(4) |
| C9 C10  | 1.385(3) | C38 C39 | 1.395(5) |
| C10 C11 | 1.374(4) | C39 C48 | 1.419(4) |
| C11 C12 | 1.417(4) | C39 C40 | 1.438(5) |
| C12 N20 | 1.387(3) | C40 C41 | 1.352(6) |
| C12 C13 | 1.396(4) | C41 C42 | 1.433(6) |
| C13 C14 | 1.391(3) | C42 C43 | 1.380(6) |
| N15 C16 | 1.466(4) | C42 C47 | 1.442(5) |
| N15 C16 | 1.466(4) | C43 C44 | 1.388(6) |
| N15 C18 | 1.469(4) | C44 C45 | 1.402(6) |
| C16 C17 | 1.521(5) | C45 C46 | 1.406(5) |
| C18 C19 | 1.504(5) | C46 C47 | 1.401(5) |
| N20 C21 | 1.463(4) | C46 C49 | 1.433(5) |
| N20 C23 | 1.481(4) | C47 C48 | 1.438(5) |
| C21 C22 | 1.513(5) | C48 C51 | 1.411(4) |
| C23 C24 | 1.444(5) | C49 C50 | 1.348(5) |
| C25 C26 | 1.377(4) | C50 C51 | 1.452(4) |

Table S3 Selected bond angles [ $^{\circ}$ ] for **RDHDNAP**

|            |            |             |          |
|------------|------------|-------------|----------|
| C2 O1 C14  | 118.60(17) | C25 C26 C27 | 118.4(3) |
| C7 C2 O1   | 123.0(2)   | C28 C27 C26 | 120.2(3) |
| C7 C2 C3   | 122.5(2)   | C29 C28 C27 | 121.5(3) |
| O1 C2 C3   | 114.5(2)   | C28 C29 C30 | 118.3(3) |
| C2 C3 C4   | 120.9(2)   | C25 C30 C29 | 120.3(3) |
| N15 C4 C5  | 121.9(2)   | C25 C30 C31 | 110.1(2) |
| N15 C4 C3  | 121.3(2)   | C29 C30 C31 | 129.6(2) |
| C5 C4 C3   | 116.8(2)   | O33 C31 N32 | 125.3(3) |
| C6 C5 C4   | 120.8(2)   | O33 C31 C30 | 129.3(3) |
| C5 C6 C7   | 123.2(2)   | N32 C31 C30 | 105.3(2) |
| C2 C7 C6   | 115.8(2)   | N34 N32 C31 | 117.9(2) |
| C2 C7 C8   | 122.1(2)   | N34 N32 C8  | 127.9(2) |
| C6 C7 C8   | 121.9(2)   | C31 N32 C8  | 114.0(2) |
| N32 C8 C7  | 111.37(19) | C35 N34 N32 | 119.7(2) |
| N32 C8 C25 | 99.61(19)  | N34 C35 C36 | 120.6(3) |
| C7 C8 C25  | 111.6(2)   | C37 C36 C51 | 119.1(3) |
| N32 C8 C9  | 111.38(19) | C37 C36 C35 | 120.4(3) |
| C7 C8 C9   | 110.91(19) | C51 C36 C35 | 120.4(3) |
| C25 C8 C9  | 111.5(2)   | C38 C37 C36 | 121.9(3) |
| C14 C9 C10 | 116.3(2)   | C37 C38 C39 | 120.4(3) |
| C14 C9 C8  | 121.4(2)   | C38 C39 C48 | 118.8(3) |



|             |            |             |          |
|-------------|------------|-------------|----------|
| C10 C9 C8   | 122.3(2)   | C38 C39 C40 | 121.9(4) |
| C11 C10 C9  | 122.8(2)   | C48 C39 C40 | 119.4(4) |
| C10 C11 C12 | 120.9(2)   | C41 C40 C39 | 121.1(4) |
| N20 C12 C13 | 121.8(2)   | C40 C41 C42 | 121.9(4) |
| N20 C12 C13 | 121.8(2)   | C43 C42 C41 | 123.2(5) |
| N20 C12 C11 | 121.7(2)   | C43 C42 C47 | 118.4(4) |
| C13 C12 C11 | 116.5(2)   | C41 C42 C47 | 118.4(4) |
| C14 C13 C12 | 120.8(2)   | C42 C43 C44 | 122.0(5) |
| C9 C14 O1   | 123.02(19) | C43 C44 C45 | 119.9(5) |
| C9 C14 C13  | 122.7(2)   | C44 C45 C46 | 119.9(5) |
| O1 C14 C13  | 114.3(2)   | C47 C46 C49 | 118.2(3) |
| C4 N15 C16  | 121.1(2)   | C45 C46 C49 | 122.0(4) |
| C4 N15 C18  | 120.6(2)   | C46 C47 C48 | 120.4(3) |
| C16 N15 C18 | 118.3(2)   | C46 C47 C42 | 119.9(4) |
| N15 C16 C17 | 115.0(3)   | C48 C47 C42 | 119.7(4) |
| N15 C18 C19 | 112.9(3)   | C51 C48 C39 | 120.3(3) |
| C12 N20 C21 | 120.5(3)   | C51 C48 C47 | 120.1(3) |
| C12 N20 C23 | 121.5(2)   | C39 C48 C47 | 119.6(3) |
| C21 N20 C23 | 117.4(2)   | C50 C49 C46 | 122.4(3) |
| N20 C21 C22 | 113.4(3)   | C49 C50 C51 | 120.5(3) |
| C24 C23 N20 | 111.7(3)   | C36 C51 C48 | 119.4(3) |
| C26 C25 C30 | 121.3(3)   | C36 C51 C50 | 122.2(3) |
| C26 C25 C8  | 127.8(2)   | C48 C51 C50 | 118.3(3) |
| C30 C25 C8  | 110.9(2)   |             |          |

Table S4 Selected bond lengths [ $\text{\AA}$ ] for **RDHPY**

|         |            |         |            |
|---------|------------|---------|------------|
| O1 C2   | 1.3829(19) | C21 C22 | 1.517(3)   |
| O1 C14  | 1.3871(18) | C23 C24 | 1.512(3)   |
| C2 C3   | 1.386(2)   | C25 C30 | 1.380(2)   |
| C2 C7   | 1.388(2)   | C25 C26 | 1.386(2)   |
| C3 C4   | 1.402(2)   | C26 C27 | 1.379(2)   |
| C4 N15  | 1.379(2)   | C27 C28 | 1.388(3)   |
| C4 C5   | 1.417(2)   | C28 C29 | 1.380(3)   |
| C5 C6   | 1.374(2)   | C29 C30 | 1.390(2)   |
| C6 C7   | 1.395(2)   | C30 C31 | 1.469(2)   |
| C7 C8   | 1.519(2)   | C31 O33 | 1.220(2)   |
| C8 N32  | 1.494(2)   | C31 N32 | 1.386(2)   |
| C8 C9   | 1.517(2)   | N32 N34 | 1.3760(19) |
| C8 C25  | 1.527(2)   | N34 C35 | 1.281(2)   |
| C9 C14  | 1.388(2)   | C35 C36 | 1.469(2)   |
| C9 C10  | 1.391(2)   | C36 C45 | 1.373(2)   |
| C10 C11 | 1.377(2)   | C36 C37 | 1.431(2)   |
| C11 C12 | 1.410(2)   | C37 C38 | 1.416(2)   |
| C12 N20 | 1.379(2)   | C37 C42 | 1.426(2)   |
| C12 C13 | 1.399(2)   | C38 C39 | 1.368(3)   |
| C13 C14 | 1.386(2)   | C39 C40 | 1.408(3)   |
| N15 C18 | 1.451(2)   | C40 C41 | 1.355(3)   |
| N15 C16 | 1.458(2)   | C41 C42 | 1.419(3)   |
| C16 C17 | 1.471(3)   | C42 C43 | 1.414(3)   |
| C18 C19 | 1.518(3)   | C43 C44 | 1.364(3)   |
| N20 C23 | 1.464(2)   | C44 C45 | 1.400(3)   |
| N20 C21 | 1.464(2)   |         |            |

Table S5 Selected bond angles [°] for **RDHPY**

|             |            |             |            |
|-------------|------------|-------------|------------|
| C2 O1 C14   | 117.68(12) | C23 N20 C21 | 117.25(14) |
| O1 C2 C3    | 114.79(14) | N20 C21 C22 | 114.34(16) |
| O1 C2 C7    | 122.52(14) | N20 C23 C24 | 114.16(16) |
| C3 C2 C7    | 122.64(15) | C30 C25 C26 | 120.30(15) |
| C2 C3 C4    | 120.67(15) | C30 C25 C8  | 111.16(15) |
| N15 C4 C3   | 121.14(15) | C26 C25 C8  | 128.53(15) |
| N15 C4 C5   | 121.83(15) | C27 C26 C25 | 118.08(17) |
| C3 C4 C5    | 117.03(14) | C26 C27 C28 | 121.52(18) |
| C6 C5 C4    | 120.46(16) | C29 C28 C27 | 120.65(16) |
| C5 C6 C7    | 122.95(15) | C28 C29 C30 | 117.62(17) |
| C2 C7 C6    | 116.14(14) | C25 C30 C29 | 121.82(17) |
| C2 C7 C8    | 120.83(14) | C25 C30 C31 | 109.30(14) |
| C6 C7 C8    | 123.03(14) | C29 C30 C31 | 128.82(16) |
| N32 C8 C7   | 112.44(13) | O33 C31 N32 | 125.89(16) |
| C9 C8 C7    | 109.82(12) | O33 C31 C30 | 128.19(15) |
| N32 C8 C25  | 99.53(12)  | N32 C31 C30 | 105.92(14) |
| C9 C8 C25   | 111.43(14) | N34 N32 C31 | 117.24(14) |
| C7 C8 C25   | 110.64(12) | N34 N32 C8  | 127.55(12) |
| C14 C9 C10  | 116.15(15) | C31 N32 C8  | 114.07(13) |
| C14 C9 C8   | 120.60(14) | C35 N34 N32 | 118.14(14) |
| C10 C9 C8   | 123.03(14) | N34 C35 C36 | 119.11(16) |
| C11 C10 C9  | 122.50(15) | C45 C36 C37 | 120.05(17) |
| C10 C11 C12 | 121.11(15) | C45 C36 C35 | 120.89(16) |
| N20 C12 C13 | 121.64(15) | C37 C36 C35 | 119.07(15) |
| N20 C12 C11 | 121.75(15) | C38 C37 C42 | 118.46(16) |
| C13 C12 C11 | 116.61(15) | C38 C37 C36 | 122.97(16) |
| C14 C13 C12 | 120.94(15) | C42 C37 C36 | 118.51(16) |
| C13 C14 O1  | 114.99(14) | C39 C38 C37 | 120.93(18) |
| C13 C14 C9  | 122.58(14) | C38 C39 C40 | 120.34(19) |
| O1 C14 C9   | 122.43(14) | C41 C40 C39 | 120.44(19) |
| C4 N15 C18  | 121.40(15) | C40 C41 C42 | 121.00(18) |
| C4 N15 C16  | 122.39(14) | C43 C42 C41 | 122.05(17) |
| C18 N15 C16 | 115.98(14) | C43 C42 C37 | 119.12(17) |
| N15 C16 C17 | 113.44(17) | C41 C42 C37 | 118.82(17) |
| N15 C18 C19 | 114.25(16) | C44 C43 C42 | 120.92(18) |
| C12 N20 C23 | 120.32(14) | C43 C44 C45 | 120.44(18) |
| C12 N20 C21 | 120.79(15) | C36 C45 C44 | 120.94(18) |

Table S6. Detection limits along with related important parameters of reported rhodamine based  $\text{Hg}^{2+}$  sensors useful for cell imaging studies

| Probe                                                                               | Medium                                                                                                                      | LOD                            | Cell imaging | Reference |
|-------------------------------------------------------------------------------------|-----------------------------------------------------------------------------------------------------------------------------|--------------------------------|--------------|-----------|
| 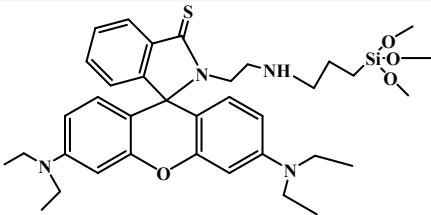   | HEPES buffered water                                                                                                        | $1 \times 10^{-6} \text{M}$    | NA           | 1         |
|    | $\text{CH}_3\text{CN}:\text{H}_2\text{O}$<br>(3:1, v/v)                                                                     | $4 \times 10^{-7} \text{M}$    | NA           | 2         |
|   | $\text{H}_2\text{O}:\text{CH}_3\text{OH}$<br>(90:10, v/v)                                                                   | $2 \times 10^{-7} \text{M}$    | NA           | 3         |
|  | Ethanol: $\text{H}_2\text{O}$<br>(50 : 50, v/v)                                                                             | $1.72 \times 10^{-9} \text{M}$ | MCF-7        | 4         |
|  | HEPES: $\text{CH}_3\text{CN}$ ,<br>20:80 (v/v)                                                                              | 0.42 ppb                       | A375 cells   | 5         |
|  | $\text{Na}_2\text{HPO}_4^-$ -<br>$\text{NaH}_2\text{PO}_4$ buffer<br>(pH 7)<br>containing 0.5%<br>(v/v) of 1,4-<br>dioxane. | $2.0 \times 10^{-8} \text{M}$  | NA           | 6         |

|                                                                                     |                                        |                         |     |    |
|-------------------------------------------------------------------------------------|----------------------------------------|-------------------------|-----|----|
| 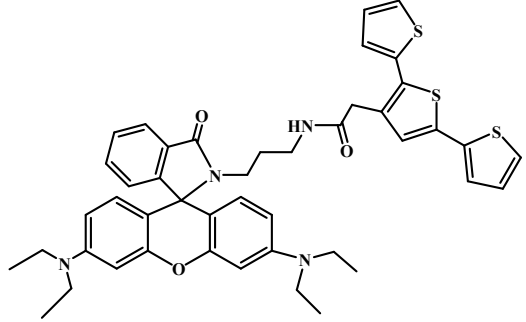   | DMSO:H <sub>2</sub> O<br>50:50(v/v)    | 1.34X10 <sup>-6</sup> M | NA  | 7  |
|    | H <sub>2</sub> O:MeCN<br>99 : 1 (v/v)  | 2.1 X10 <sup>-9</sup> M | NA  | 8  |
|   | Water:ethanol<br>50:50 (v/v)           | 4.0×10 <sup>-8</sup> M  | NA  | 9  |
|  | THF:H <sub>2</sub> O<br>(9.5:0.5, v/v) | 2X10 <sup>-6</sup>      | PC3 | 10 |

NA = Not available/ not performed

## References

1. B. Liu, F. Zeng, Y. Liua and S. Wu, *Analyst*, 2012, 137, 1698.
2. X. Wang , M. Iqbal , J. Huskens and W. Verboom, *Int. J. Mol. Sci.* 2012, 13, 16822.
3. K. N. Kim, M. G. Choi, J. H. Noh, S. Ahn, and S.K. Chang, *Bull. Korean Chem. Soc.* 2008, 29, 3 571.
4. Y. Zhou, X. Y. You, Y. Fang, J. Y. Li, K. Liu and C. Yao, *Org. Biomol. Chem.*, 2010, 8, 4819.
5. Y. Zhou, K. Chu, H. Zhen, Y. Fang, C. Yao *Molecular and Biomolecular Spectroscopy*, 2013,106, 197.
6. W. Shi and H. Ma, *Chem. Commun.*, 2008, 1856.
7. C. Kaewtong, N. Niamsa, B. Wannoo, N. Morakot, B. Pulpoka and T. Tuntulani, *New J. Chem*, 2014, 38, 3831.
8. X. Q. Zhan, Z. H. Qian, H. Zheng, B. Y. Su, a Z. Lan and J. G. Xu, *Chem. Commun.*, 2008, 1859.

9. Q. J. Ma, X. B. Zhang, X. H. Zhao, Z. Jin , G. J. Mao, G. L. Shen, R. Q. Yu, *Analytica Chimica Acta*, 2010, 663, 85.
10. M. Kumar, N. Kumar, V. Bhalla, H. Singh, P. R. Sharma and T. Kaur, *Org. Lett.*, 2011, 13, 1422.
